# Supplementary material for: Spectrally independent and wide-angle light extraction of organic light emitting diodes with randomly disassembled nanostructure
Source: Royal Society of Chemistry journal article supplement (doi:10.1039/d4nr01301h), 2024-01-01
Supplement: d4nr01301h2.pdf [file d4nr01301h2.pdf]

Supporting Information.

# Spectrally Independent and Wide-Angle Light Extraction of Organic Light Emitting Diodes with Randomly Disassembled Nanostructure

*Ndikumana Joel<sup>†</sup>, Kunsik An<sup>\*†</sup>*

<sup>†</sup> Department of Mechatronics Engineering, Konkuk University, Chungju 27478, Republic of  
Korea

<sup>\*</sup> Corresponding author.

E-mail address: kunsik1214@kku.ac.kr (K. An).

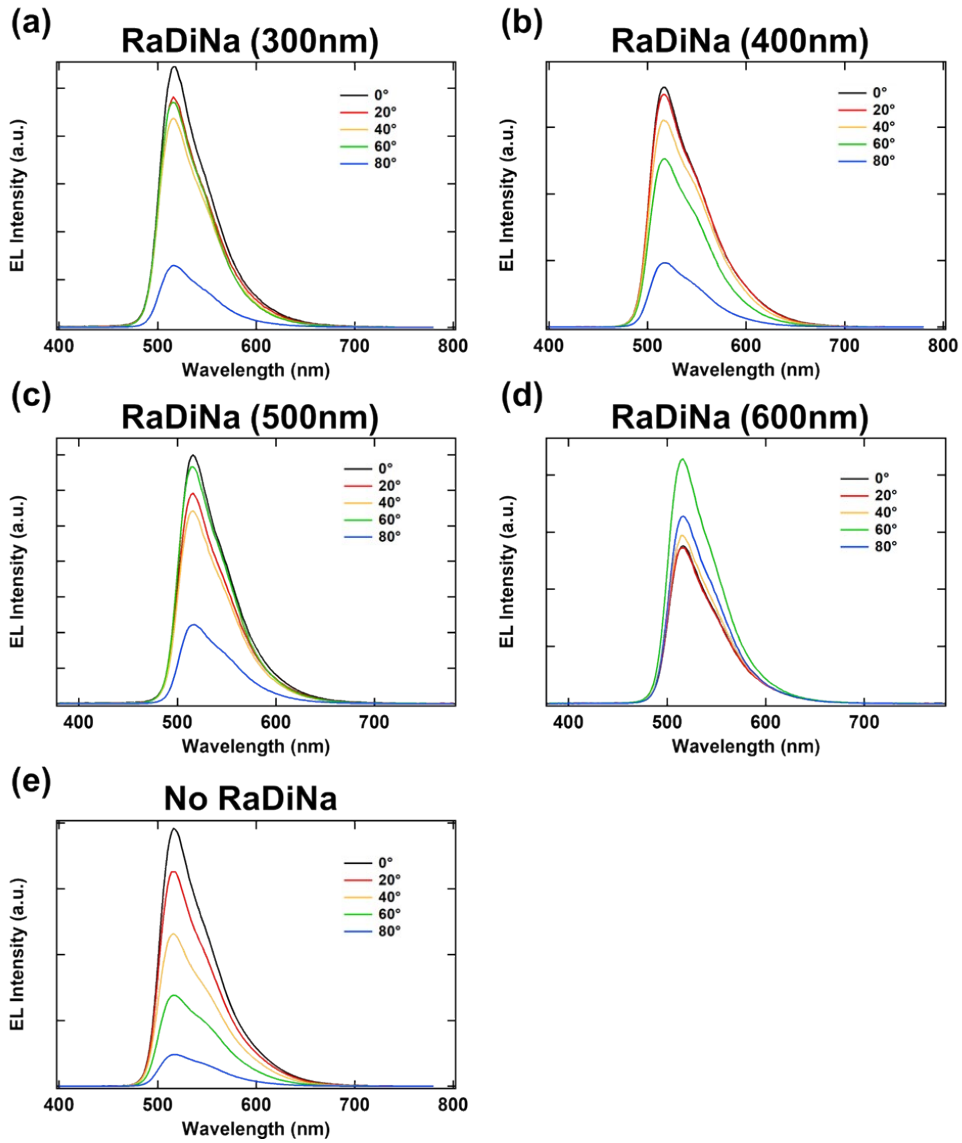

**Figure S1.** Unnormalized electroluminescence (EL) spectra at various average lengths of ZnO NRs: (a) 300 nm, (b) 400 nm, (c) 500 nm, (d) 600 nm, and (e) without RaDiNa. The spectra are plotted at different viewing angles (0°, 20°, 40°, 60°, and 80°) to illustrate the impact of RaDiNa on device performance.

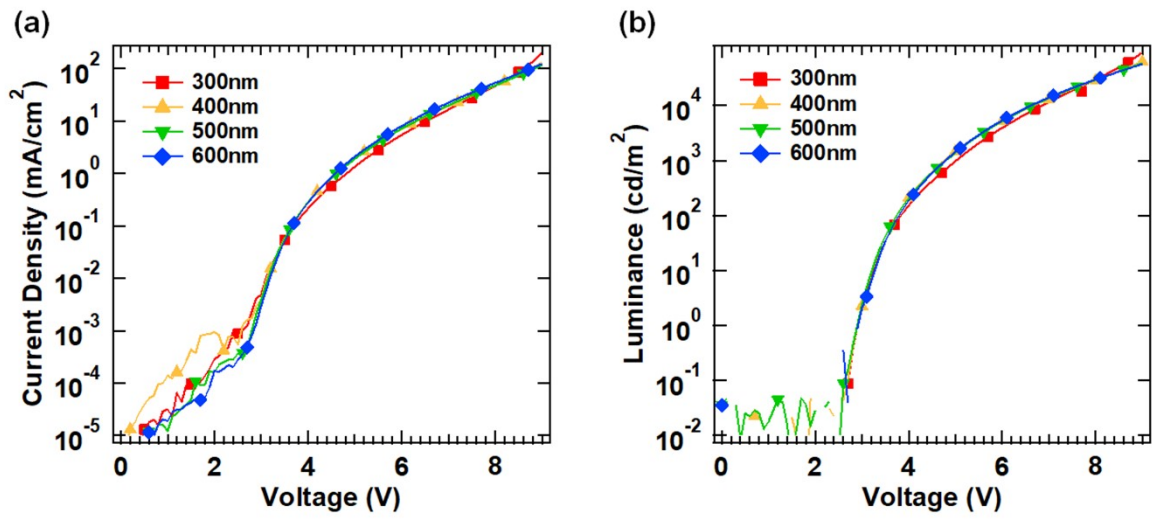

Figure S2. a) Current density-voltage characteristics and b) Luminance-voltage characteristics

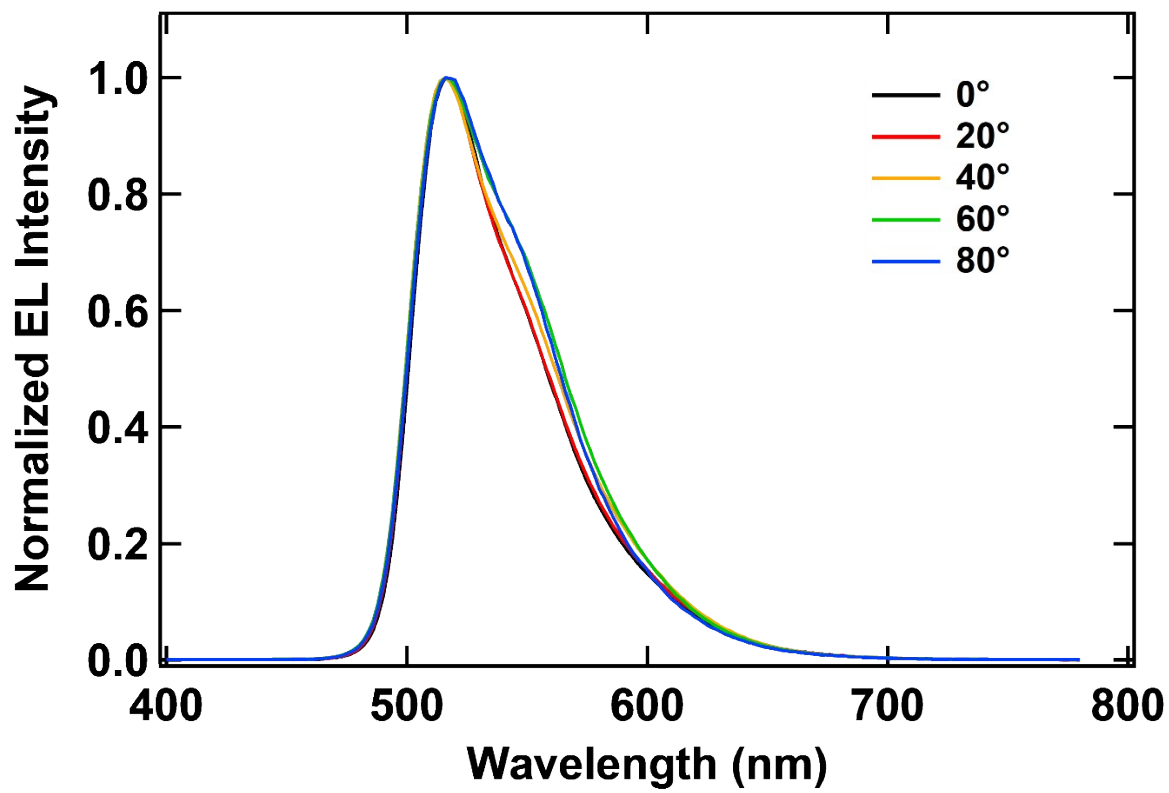

Figure S3. angular EL spectra of the fabricated OLEDs without RaDiNa across different viewing angles (0°, 20°, 40°, 60°, and 80°).
